# 1 Surface protein imputation from single cell transcriptomes 2 by deep neural networks

3 Zilu Zhou<sup>1,2</sup>, Chengzhong Ye<sup>3</sup>, Jingshu Wang<sup>2</sup>, Nancy R. Zhang<sup>2\*</sup>

4 1) Graduate Group in Genomics and Computational Biology, University of Pennsylvania,  
5 Philadelphia, PA

6 2) Department of Statistics, University of Pennsylvania, Philadelphia, PA

7 3) School of Medicine, Tsinghua University, Beijing, China

8 \* Correspondence:

9

10 Nancy R. Zhang

11 [nzh@wharton.upenn.edu](mailto:nzh@wharton.upenn.edu)

12 (215) 898-8007

13 Department of Statistics

14 The Wharton School

15 University of Pennsylvania

16

17 **While single cell RNA sequencing (scRNA-seq) is invaluable for studying cell**

18 **populations, cell-surface proteins are often integral markers of cellular function and**

19 **serve as primary targets for therapeutic intervention. Here we propose a transfer learning**

20 **framework, single cell Transcriptome to Protein prediction with deep neural network**

21 **(cTP-net), to impute surface protein abundances from scRNA-seq data by learning from**

22 **existing single-cell multi-omic resources.**

23 Keywords: genomics, immunophenotypes, single cell sequencing, deep learning, prediction,

24 multi-omics

## 25 Introduction

26 Recent technological advances allow the simultaneous profiling, across many cells in parallel, of

27 multiple omics features in the same cell<sup>1-5</sup>. In particular, high throughput quantification of the

28 transcriptome and a selected panel of cell surface proteins in the same cell is now feasible

29 through the REAP-seq and CITE-seq protocols <sup>2,3</sup>. Cell surface proteins can serve as integral  
30 markers of specific cellular functions and primary targets for therapeutic intervention.  
31 Immunophenotyping by cell surface proteins has been an indispensable tool in hematopoiesis,  
32 immunology and cancer research during the past 30 years. Yet, due to technological barriers  
33 and cost considerations, most single cell studies, including Human Cell Atlas project <sup>6</sup>, quantify  
34 the transcriptome only and do not have cell-matched measurements of relevant surface proteins  
35 <sup>7,8</sup>. Sometimes, which cell types and corresponding surface proteins are essential become  
36 apparent only after exploration by scRNA-seq. This motivates our inquiry of whether protein  
37 abundances in individual cells can be accurately imputed by the cell's transcriptome.  
38 We propose cTP-net (single cell Transcriptome to Protein prediction with deep neural network),  
39 a transfer learning approach based on deep neural networks that imputes surface protein  
40 abundances for scRNA-seq data. Through comprehensive benchmark evaluations and  
41 applications to Human Cell Atlas and acute myeloid leukemia data sets, we show that cTP-net  
42 outperform existing methods and can transfer information from training data to accurately  
43 impute 24 immunophenotype markers, which achieve a more detailed characterization of  
44 cellular state and cellular phenotypes than transcriptome measurements alone. cTP-net relies,  
45 for model training, on accumulating public data of cells with paired transcriptome and surface  
46 protein measurements.

47

## 48 Results

### 49 Method overview

50 An overview of cTP-net is shown in Figure 1a. Studies based on both CITE-seq and REAP-seq  
51 have shown that the relative abundance of most surface proteins, at the level of individual cells,

52 is only weakly correlated with the relative abundance of the RNA of its corresponding gene<sup>2,3,9</sup>.  
53 This is due to technical factors such as RNA and protein measurement error<sup>10</sup>, as well as  
54 inherent stochasticity in RNA processing, translation and protein transport<sup>11-15</sup>. To accurately  
55 impute surface protein abundance from scRNA-seq data, cTP-net employs two steps: (1)  
56 denoising of the scRNA-seq count matrix and (2) imputation based on the denoised data  
57 through a transcriptome-protein mapping (Figure 1a). The initial denoising, by SAVER-X<sup>16</sup>,  
58 produces more accurate estimates of the RNA transcript relative abundances for each cell.  
59 Compared to the raw counts, the denoised relative expression values have significantly  
60 improved correlation with their corresponding protein measurement (Figure 1b, S3a, S4ab). Yet,  
61 for some surface proteins, such as CD45RA, this correlation for denoised expression is still  
62 extremely low.

63 The production of a surface protein from its corresponding RNA transcript is a complicated  
64 process involving post-transcriptional modifications and transport<sup>11</sup>, translation<sup>12</sup>, post-  
65 translational modifications<sup>13</sup> and protein trafficking<sup>14</sup>. These processes depend on the state of  
66 the cell and the activities of other genes<sup>9,15</sup>. To learn the mapping from a cell's transcriptome to  
67 the relative abundance of a given set of surface proteins, cTP-net employs a multiple branch  
68 deep neural network (MB-DNN, Figure S1). Deep neural networks have recently shown success  
69 in modeling complex biological systems<sup>17,18</sup>, and more importantly, allow good generalization  
70 across data sets<sup>16,19</sup>. Generalization performance is an important aspect of cTP-net, as we  
71 would like to perform imputation on tissues that do not exactly match the training data in cell  
72 type composition. Details of the cTP-net model and training procedure, as well as of alternative  
73 models and procedures that we have tried, are in Methods and Supplementary Note.

74

75 Imputation accuracy assessment and transfer learning

## 76 Evaluation via random holdout

77 To examine imputation accuracy, we first consider the ideal case where imputation is conducted  
78 on cells of types that exactly match those in training data. For benchmarking, we used  
79 peripheral blood mononuclear cells (PBMCs) and cord blood mononuclear cells (CBMCs)  
80 processed by CITE-seq and REAP-seq<sup>2,3</sup>, described in Table S1. We employed holdout  
81 method, where the cells in each data set were randomly partitioned into two sets: a training set  
82 with 90% of the cells and a holdout set with the remaining 10% of the cells for validation  
83 (Methods, Figure S2a). Each cell type is well represented in both the training and validation  
84 sets. Figure 1b and S3a show that, for all proteins examined in the CITE-seq PBMC data, cTP-  
85 net imputed abundances have much higher correlation to the measured protein levels, as  
86 compared with the denoised and raw RNA counts of the corresponding genes. We obtained  
87 similar results for the CITE-seq CBMC and REAP-seq PBMC data sets (Figure S4ab).

88

## 89 Generalization to unseen cell types

90 Next, we considered the generalization accuracy of cTP-net, testing whether it produces  
91 accurate imputations for cell types that are not present in the training set. For each of the high-  
92 level cell types in each data set in Table S2, all cells of the given type are held out during  
93 training, and cTP-net, trained on the rest of the cells, was then used to impute protein  
94 abundances for the held out cells (Methods, Figure S2b). We did this for each cell type and  
95 generated an “out-of-cell-type” prediction for every cells.

96 Across all benchmarking data sets and all cell types, these out-of-cell-type predictions still  
97 improve significantly upon the corresponding RNA counts while slightly inferior in accuracy to  
98 the traditional holdout validation predictions above (Figure 2a, S4a). This indicates that cTP-net

99 provides informative predictions on cell types not present during training, vastly improving upon  
100 using the corresponding mRNA transcript abundance as proxy for the protein level.

101

## 102 Generalization across tissue and lab protocol

103 To further examine the case where cell types in the training and test data are not perfectly  
104 aligned, we considered a scenario where the model is applied to perform imputation on a tissue  
105 that differs from the training data. We trained cTP-net on PBMCs and then applied it to perform  
106 imputation on CBMCs, and vice versa, using the data from Stoeckius et al. <sup>3</sup> (Methods). Cord  
107 blood is expected to be enriched for stem cells and cells undergoing differentiation, whereas  
108 peripheral blood contains well-differentiated cell types, and thus the two populations are  
109 composed of different but related cell types. Figure 2a and S3b shows the result on training on  
110 CBMC and then imputing on PBMC. Imputing across tissue markedly improves the correlation  
111 to the measured protein level, as compared to the denoised RNA of the corresponding gene,  
112 but is worse than imputation produced by model trained on the same population. For practical  
113 use, we have trained a network using the all cell populations combined, which indeed achieves  
114 better accuracy than a network trained on each separately (Methods, Figure S3b, S4ac). The  
115 weights for this network are publicly available at <https://github.com/zhoulilu/cTPnet>.

116 We then tested whether cTP-net's predictions are sensitive to the laboratory protocol, and in  
117 particular, whether networks trained using CITE-seq data yields good predictions by REAP-  
118 seq's standard, and vice versa. Using a benchmarking design similar to above, we found that, in  
119 general, cTP-net maintains good generalization power across these two protocols (Figure 2a,  
120 S3b).

121

## 122 Comparison to Seurat v3

123 Seurat v3 anchor transfer <sup>20</sup> is a recent approach that uses cell alignment between data sets to  
124 impute features for single cell data. For comparison, we applied Seurat v3 anchor transfer to the  
125 holdout validation and out-of-cell-type benchmarking scenarios above (Methods). In the  
126 validation scenario, we found the performance of cTP-net and Seurat v3 to be comparable, with  
127 cTP-net slightly better, as both methods can estimate protein abundance by utilizing marker  
128 genes to identify the cell types. cTP-net, however, vastly improves upon Seurat in the out-of-  
129 cell-type scenario (Figure 2a, S5a). This is because cTP-net's neural network, trained across a  
130 diversity of cell types, learns a direct transcriptome-protein mapping that can more flexibly  
131 generalize to unseen cell types, while Seurat v3 depends on a nearest neighbor method that  
132 can only sample from the training dataset. As shown by the cross-population and out-of-cell-  
133 type benchmarking above, cTP-net does not require direct congruence of cell types across  
134 training and test sets.

135 In addition to predictions on unseen cell type, cTP-net also improves upon the existing state-of-  
136 the-art in capturing within cell-type variation in protein abundance. As expected, within cell-type  
137 variation is harder to predict, but cTP-net's imputations nevertheless achieve high correlations  
138 with measured protein abundance for a subset of proteins and cell types (Figure S3c, S4d).  
139 Compared to Seurat v3, cTP-net's imputations align more accurately with measured protein  
140 levels when zoomed into cells of the same type (Figure 2b, S5b); see Figure 2c, for example,  
141 CD11c in CD14-CD16+ monocytes, CD2 in CD8 T cells, and CD16 in dendritic cells. All of these  
142 surface proteins have important biological function in the corresponding cell types, as CD11c  
143 helps trigger respiratory burst in monocyte <sup>21</sup>, CD2 co-stimulates molecule on T cells <sup>22</sup> and  
144 CD16 differentiate DC subpopulation <sup>23</sup>. The learning of such within-type heterogeneity gives  
145 cTP-net the potential to attain higher resolution in the discovery and labeling of cell states.

146

147 Network interpretation and feature importance

148 What types of features are being used by cTP-net to form its imputation? To interpret the  
149 network, we conducted a permutation-based interpolation analysis, which calculates a  
150 permutation feature importance for each protein-gene pair (Methods, Figure S6a). Interpolation  
151 can be done using all cells, or cells of a specific type, the latter allowing us to probe  
152 relationships that may be specific to a given cell type. Applying this analysis to cTP-net trained  
153 on PBMC, we found that, at the level of the general population that includes all cell types, the  
154 most important genes for the prediction of each protein are those that exhibit the highest cell-  
155 type specificity in expression (Table S3). This is because most of these surface proteins are  
156 cell type markers, and thus when cells of all types are pooled together, “cell type” is the key  
157 latent variable that underlies their heterogeneity. Within cell type interpolation, on the other  
158 hand, reveals genes related to RNA processing, RNA binding, protein localization and  
159 biosynthetic processes, in addition to immune-related genes that differentiate the immune cell  
160 sub-types (Table S4). This analysis shows that cTP-net combines different types of features,  
161 both cell type markers and genes involved in RNA to protein conversion and transport, to  
162 achieve multiscale imputation accuracy.

163 In addition, we analyzed the bottleneck layer with 128 nodes before the network branched out to  
164 the protein-specific layers. We performed dimension reduction (UMAP) directly on the  
165 bottleneck layer intermediate output of 7000 PBMCs from CITE-seq. Figure S6b shows that the  
166 cells are cleanly separated into different clusters, representing cell types as well as gradients in  
167 surface protein abundance. This confirms that the bottleneck layer captures the essential  
168 information on cell stages and transitions, and that each subsequent individual branch then  
169 predicts its corresponding protein’s abundance.

170

171 Application to Human Cell Atlas

172 Having benchmarked cTP-net's generalization accuracy across immune cell types, tissues, and  
173 technologies, we then applied the network trained on the combined CITE-seq dataset of  
174 PBMCs, CBMCs and bone marrow mononuclear cells (BMMCs)<sup>3, 24</sup> to perform imputation for the  
175 Human Cell Atlas CBMC and BMMC data sets (Table S1). Figure 3 shows the raw RNA count  
176 and predicted surface protein abundance for 24 markers across 6023 BMMCs from sample  
177 MantonBM1 and 4176 CBMCs from sample MantonCB1. (Similar plots for the other 7 BMMC  
178 and 7 CBMC samples are shown in Figure S8, S9). Similar to what was observed for actual  
179 measured protein abundances in the CITE-seq and REAP-seq studies, the imputed protein  
180 levels differ markedly from the RNA expression of its corresponding gene, displaying higher  
181 contrast across cell types and higher uniformity within cell type. Thus, the imputed protein levels  
182 can serve as interpretable intermediate features for the identification and labelling of cell states.  
183 For example, imputed CD4 and CD8 levels separate CD4+ T cells from CD8+ T cells with high  
184 confidence. Further separation of naïve T cells to memory T cells can be achieved through  
185 imputed CD45RA/CD45RO abundance, as CD45RA is a naïve antigen and CD45RO is a  
186 memory antigen. Consistent with flow cytometry data, the large majority of CB T cells are naïve,  
187 whereas the BM T cell population is more diverse<sup>25</sup>. Also, for BM B cells that have high imputed  
188 CD19 levels, cTP-net allows us to confidently distinguish the Pre.B (CD38+, CD127+), immature  
189 B (CD38+, CD79b+), memory B (CD27+) and naïve B cells (CD27-), whose immunophenotypes  
190 have been well characterized<sup>26</sup>.

191 In addition, consider natural killer cells, in which the proteins CD56 and CD16 serve as  
192 indicators for immunostimulatory effector functions, including an efficient cytotoxic capacity<sup>27, 28</sup>.

193 We observe an opposing gradient of imputed CD56 and CD16 levels within transcriptomically  
194 derived natural killer (NK) cell clusters that reveal CD56<sup>bright</sup> and CD56<sup>dim</sup> subsets, coherent with  
195 previous studies<sup>3</sup> (Figure 2f, Figure S10, F-test: p-value = 1.667e-15). This pattern is not found  
196 in RNA abundances due to low expression (F-test: p-value= 0.9377). Between CD56<sup>bright</sup> and



197 CD56<sup>dim</sup> subsets, 7 out of 10 of previously studied differentially expressed genes are significant  
198 in the single cell analysis (Fisher test: p-value = 1.07e-04)<sup>3, 29, 30</sup>. This gradient in CD56 and  
199 CD16, where decrease in CD56 is accompanied by increase in CD16, is replicated across the 8  
200 CBMC and 8 BMMC samples in HCA (Figure S8, S9, S10).

201 Consider also the case of CD57, which is a marker for terminally differentiated “senescent” cells  
202 in the T and NK cell types. The imputed level of CD57 is lower in CBMCs (fetus’s blood), and  
203 rises in BMMCs (95% quantile: bootstrap p-value<1e-6). This is consistent with expectation  
204 since CD57+ NK cell and T cell populations grow after birth and with ageing<sup>31-33</sup> (Figure S8,  
205 S9).

206 These results demonstrate how cTP-net, trained on a combination of PBMCs, CBMCs and  
207 BMMCs, can impute cell type, cell stage, and tissue-specific protein signatures in new data  
208 without explicitly being given the tissue of origin.

209

## 210 Application to Acute Myeloid Leukemia

211 We further apply cTP-net to an acute myeloid leukemia (AML) data set from Galen et al.<sup>34</sup>. AML  
212 is a heterogeneous disease where the diversity of malignant cell types partially recapitulates the  
213 stages of myeloid development. Mapping the malignant cells in AML to the differentiation stage  
214 of their cell of origin strongly impacts tumor prognosis and treatment, as malignant cells that  
215 originate from earlier stage progenitors have higher risk of relapse<sup>35, 36</sup>. In the original paper,  
216 the authors sequenced 7698 cells from 5 healthy donors to build a reference map of cell types  
217 during myeloid development, and then mapped 30712 cells from 16 AML patients across  
218 multiple time points to this reference to identify the differentiation stage of the malignant cells.  
219 Here, by imputing 24 immunophenotype markers with cTP-net, we can directly characterize the  
220 differentiation stage of cell-of-origin for the malignant cells.

221 Figure 4a is a UMAP plot based on imputed surface protein abundance of 5 normal BMs and 12  
222 Day 0 samples from AML patients. The majority of the malignant cells as identified in the  
223 original paper reside on the right half of the plot, which recapitulate the myeloid differentiation  
224 trajectory as revealed by the imputed values of canonical protein markers (Figure 4b): From  
225 CD34+ progenitors to CD38+CD123+ cells in transition to CD11c+ and CD14+ mature  
226 monocytes<sup>37</sup>. All of the malignant cells have imputed protein values that place them along this  
227 monocyte lineage. Using the transcriptome for visualization, on the other hand, reveals large  
228 batch effects across samples, due to both technical batch and biological differences (Figure  
229 S11). Thus, unlike the imputed protein data, the transcriptomic data cannot be directly  
230 combined without alignment.

231 Based on the trajectory revealed by the imputed protein levels, we can determine the  
232 differentiation cell stage(s) for the malignant cells of each tumor, according to which the 12 AML  
233 patients can be divided into three categories: (1) AMLs of single differentiation stage (AML420B,  
234 AML556, AML707B and AML916; Figure 4c), (2) AMLs of two differentiation stages (AML210A,  
235 AML328, AML419A and AML475; Figure 4e) and (3) AMLs of many differentiation stages  
236 (AML1012, AML329, AML870 and AML921A; Figure 4f). This stage assignment is consistent  
237 with the original study<sup>34</sup>. For example, AML419A harbors two malignant cell types at opposite  
238 ends of the monocyte differentiation axis, distinguished by imputed CD34 and CD11c levels as  
239 CD34+CD11c- indicates progenitor-like and CD34-CD11c+ indicates differentiated monocyte-  
240 like cells (Figure 4d, 4e). AML707B, which carries a RUNX1/RUNX1T1 fusion, consists of cells  
241 of a specific cell stage that is distinct from the normal myeloid trajectory (Figure 4c). Such  
242 unique cell cluster was due to hyper CD38 level in surface protein prediction (Figure 4d). Such  
243 hyper-CD38 levels have been reported in AMLs with RUNX1/RUNX1T1 fusion<sup>38-40</sup> and recent  
244 studies have also shown that CD38 can be a potential target for adult AML<sup>41, 42</sup>.

245 In this example, the imputed protein levels served as useful features for trajectory visualization.  
246 This analysis also indicates that even though cTP-net is currently trained only on normal  
247 immune cells, it can reveal disease-specific signatures in malignant cells and the imputed  
248 protein levels are useful for characterizing tumor phenotypes.

249

## 250 Discussion

251 Taken together, our results demonstrate that cTP-net can leverage existing CITE-seq and  
252 REAP-seq datasets to predict surface protein relative abundances for new scRNA-seq data  
253 sets, and that the predictions generalize to cell types that are absent from, but related to those  
254 in the training data. cTP-net was benchmarked on PBMC and CBMC immune cells, showing  
255 good generalization across tissues and technical protocols. On Human Atlas Data, we show  
256 that the imputed surface protein levels allow easy assignment of cells to known cell types, as  
257 well as the revealing of intra-cell type gradients. We then demonstrate that, even though cTP-  
258 net used only immune cells from healthy individuals for training, it is able to impute  
259 immunophenotypes for malignant cells from acute myeloid leukemia, and that these  
260 immunophenotypes allow placement of the cells along the myeloid differentiation trajectory.  
261 Furthermore, we show that cTP-net is able to impute protein signatures in the malignant cells  
262 that are disease specific and that are not easily detectable from the transcriptomic counts.  
263 SAVER-X serves an important role in the training procedure of cTP-net. As shown in Table S5,  
264 without SAVER-X denoising, the cTP-net prediction performance retracts by 0.02 in correlation,  
265 more significant than any other parameter tweaks. This discrepancy in performance is due to:  
266 (1) SAVER-X makes use of the noise model to obtain estimates of the true RNA counts. This  
267 helps cTP-net learn the underlining relationship between true RNA counts and protein level,  
268 rather than the noisy raw counts and protein levels, which varies more across data sets and

269 thus does not generalize well. (2) By denoising the scRNA-seq, the input for learning the RNA-  
270 protein relationship is less sparse. Manifold learning on a more continuous input space usually  
271 works better<sup>43, 44</sup>. (3) Comparing to other autoencoder based denoising method, SAVER-X  
272 performs Bayesian shrinkage on top of autoencoder framework to prevent over-imputation  
273 (over-smoothing)<sup>16, 45</sup>.

274 Despite these promising results, cTP-net has limitations. (1) cTP-net can only apply to count  
275 based expression input (UMI-based). CITE-seq data with TPM and RPKM expression metric is  
276 not available for testing. Thus, the prediction accuracy is unknown. (2) The generalization ability  
277 of cTP-net to unrelated cell types has limitations. Even though the final cTP-net model, trained  
278 on immune cells, has good results on immune cells from diverse settings, we have not tried to  
279 perform imputation of these immune-related markers on cells that are not of the hematopoietic  
280 lineage.

281 With the accumulation of publicly available CITE-seq and REAP-seq data across diverse  
282 proteins, cell types and conditions, cTP-net can be retrained to accommodate more protein  
283 targets and improve in generalization accuracy. The possibility of such cross-omic transfer  
284 learning underscores the need for more diverse multi-omic cell atlases, and demonstrate how  
285 such resources can be used to enhance future studies. The cTP-net package is available both  
286 in Python and R at <https://github.com/zhouzilu/cTPnet>.

287

## 288 **Acknowledgements**

289 We would like to thank the National Institutes of Health for the award 5R01-HG006137 (for Z.Z.,  
290 and N.Z.), award 1U2CCA233285-01 (for N.Z.), the National Science Foundation for the

291 award DMS-1562665 (to J.W., N.Z.), and the Wharton Dean's Fund for Post-doctoral  
292 Research (to J.W.).

## 293 **Author Contributions**

294 Z.Z. and N.Z. conceptualized the study and planned the case studies. Z.Z. designed the model,  
295 developed the algorithm, implemented the cTP-net software and led the data analysis. C.Y.  
296 helped in CITE-seq and REAP-seq data denoising and cell type labeling. J.W. helped with model  
297 design and Human Cell Atlas data analysis. Z.Z. and N.Z. wrote the paper with feedback from  
298 C.Y. and J.W.

## 299 **Competing Financial Interests Statement**

300 The authors declare no competing interests

301

## 302 **References**

- 303 1. Stuart, T. & Satija, R. Integrative single-cell analysis. *Nat Rev Genet* **20**, 257-272 (2019).
- 304 2. Peterson, V.M. et al. Multiplexed quantification of proteins and transcripts in single cells.  
305 *Nat Biotechnol* **35**, 936-939 (2017).
- 306 3. Stoeckius, M. et al. Simultaneous epitope and transcriptome measurement in single  
307 cells. *Nat Methods* **14**, 865-868 (2017).
- 308 4. Macaulay, I.C. et al. G&T-seq: parallel sequencing of single-cell genomes and  
309 transcriptomes. *Nat Methods* **12**, 519-522 (2015).
- 310 5. Wang, X. et al. Three-dimensional intact-tissue sequencing of single-cell transcriptional  
311 states. *Science* **361** (2018).
- 312 6. Regev, A. et al. The Human Cell Atlas. *Elife* **6** (2017).
- 313 7. Tirosh, I. et al. Dissecting the multicellular ecosystem of metastatic melanoma by single-  
314 cell RNA-seq. *Science* **352**, 189-196 (2016).
- 315 8. Villani, A.C. et al. Single-cell RNA-seq reveals new types of human blood dendritic cells,  
316 monocytes, and progenitors. *Science* **356** (2017).
- 317 9. Liu, Y., Beyer, A. & Aebersold, R. On the Dependency of Cellular Protein Levels on  
318 mRNA Abundance. *Cell* **165**, 535-550 (2016).
- 319 10. Svensson, V. et al. Power analysis of single-cell RNA-sequencing experiments. *Nat*  
320 *Methods* **14**, 381-387 (2017).
- 321 11. Zhao, B.S., Roundtree, I.A. & He, C. Post-transcriptional gene regulation by mRNA  
322 modifications. *Nat Rev Mol Cell Biol* **18**, 31-42 (2017).

- 323 12. Jackson, R.J., Hellen, C.U. & Pestova, T.V. The mechanism of eukaryotic translation  
324 initiation and principles of its regulation. *Nat Rev Mol Cell Biol* **11**, 113-127 (2010).
- 325 13. Mowen, K.A. & David, M. Unconventional post-translational modifications in  
326 immunological signaling. *Nat Immunol* **15**, 512-520 (2014).
- 327 14. Schwartz, A.L. Cell biology of intracellular protein trafficking. *Annu Rev Immunol* **8**, 195-  
328 229 (1990).
- 329 15. Roux, P.P. & Topisirovic, I. Signaling Pathways Involved in the Regulation of mRNA  
330 Translation. *Mol Cell Biol* **38** (2018).
- 331 16. Wang, J. et al. Data denoising with transfer learning in single-cell transcriptomics. *Nat*  
332 *Methods* **16**, 875-878 (2019).
- 333 17. Webb, S. Deep learning for biology. *Nature* **554**, 555-557 (2018).
- 334 18. Tang, B., Pan, Z., Yin, K. & Khateeb, A. Recent Advances of Deep Learning in  
335 Bioinformatics and Computational Biology. *Front Genet* **10**, 214 (2019).
- 336 19. Lopez, R., Regier, J., Cole, M.B., Jordan, M.I. & Yosef, N. Deep generative modeling for  
337 single-cell transcriptomics. *Nat Methods* **15**, 1053-1058 (2018).
- 338 20. Stuart, T. et al. Comprehensive Integration of Single-Cell Data. *Cell* (2019).
- 339 21. Martins, P.S. et al. Expression of cell surface receptors and oxidative metabolism  
340 modulation in the clinical continuum of sepsis. *Crit Care* **12**, R25 (2008).
- 341 22. Chen, L. & Flies, D.B. Molecular mechanisms of T cell co-stimulation and co-inhibition.  
342 *Nat Rev Immunol* **13**, 227-242 (2013).
- 343 23. Fromm, P. et al. CD16+Dendritic Cells Are a Unique Myeloid Antigen Presenting Cell  
344 Population. *Blood* **128** (2016).
- 345 24. Stuart, T. et al. Comprehensive Integration of Single-Cell Data. *Cell* **177**, 1888-+ (2019).
- 346 25. D'Arena, G. et al. Flow cytometric characterization of human umbilical cord blood  
347 lymphocytes: immunophenotypic features. *Haematologica* **83**, 197-203 (1998).
- 348 26. Clavarino, G. et al. Novel Strategy for Phenotypic Characterization of Human B  
349 Lymphocytes from Precursors to Effector Cells by Flow Cytometry. *Plos One* **11** (2016).
- 350 27. Van Acker, H.H., Capsomidis, A., Smits, E.L. & Van Tendeloo, V.F. CD56 in the Immune  
351 System: More Than a Marker for Cytotoxicity? *Front Immunol* **8**, 892 (2017).
- 352 28. Tsukerman, P. et al. Expansion of CD16 positive and negative human NK cells in  
353 response to tumor stimulation. *Eur J Immunol* **44**, 1517-1525 (2014).
- 354 29. Poli, A. et al. CD56(bright) natural killer (NK) cells: an important NK cell subset.  
355 *Immunology* **126**, 458-465 (2009).
- 356 30. Wendt, K. et al. Gene and protein characteristics reflect functional diversity of CD56(dim)  
357 and CD56(bright) NK cells. *J Leukocyte Biol* **80**, 1529-1541 (2006).
- 358 31. d'Angeac, A.D. et al. CD57+ T lymphocytes are derived from CD57- precursors by  
359 differentiation occurring in late immune responses. *Eur J Immunol* **24**, 1503-1511 (1994).
- 360 32. Musha, N. et al. Expansion of CD56+ NK T and gamma delta T cells from cord blood of  
361 human neonates. *Clin Exp Immunol* **113**, 220-228 (1998).
- 362 33. Dalle, J.H. et al. Characterization of cord blood natural killer cells: implications for  
363 transplantation and neonatal infections. *Pediatr Res* **57**, 649-655 (2005).
- 364 34. van Galen, P. et al. Single-Cell RNA-Seq Reveals AML Hierarchies Relevant to Disease  
365 Progression and Immunity. *Cell* **176**, 1265-+ (2019).
- 366 35. Pollyea, D.A. & Jordan, C.T. Therapeutic targeting of acute myeloid leukemia stem cells.  
367 *Blood* **129**, 1627-1635 (2017).
- 368 36. McKenzie, M.D. et al. Interconversion between Tumorigenic and Differentiated States in  
369 Acute Myeloid Leukemia. *Cell Stem Cell* **25**, 258-+ (2019).
- 370 37. Geissmann, F. et al. Development of Monocytes, Macrophages, and Dendritic Cells.  
371 *Science* **327**, 656-661 (2010).

- 372 38. Jang, J.H. et al. Acute myeloid leukemia with del(X)(p21) and cryptic RUNX1/RUNX1T1  
373 from ins(8;21)(q22;q22q22) revealed by atypical FISH signals. *Ann Clin Lab Sci* **40**, 80-  
374 84 (2010).
- 375 39. Moroi, K. & Sato, T. Comparison between procaine and isocarboxazid metabolism in  
376 vitro by a liver microsomal amidase-esterase. *Biochem Pharmacol* **24**, 1517-1521  
377 (1975).
- 378 40. Shang, L. et al. The immunophenotypic characteristics and flow cytometric scoring  
379 system of acute myeloid leukemia with t(8;21) (q22;q22); RUNX1-RUNX1T1. *Int J Lab*  
380 *Hematol* **41**, 23-31 (2019).
- 381 41. Naik, J. et al. CD38 as a therapeutic target for adult acute myeloid leukemia and T-cell  
382 acute lymphoblastic leukemia. *Haematologica* **104**, E100-E103 (2019).
- 383 42. Eveillard, M. et al. CD38 Expression in B-Lineage Acute Lymphoblastic Leukemia, a  
384 Possible Target for Immunotherapy. *Blood* **128** (2016).
- 385 43. An, G.Z. The effects of adding noise during backpropagation training on a generalization  
386 performance. *Neural Comput* **8**, 643-674 (1996).
- 387 44. Reed, R. & MarksII, R.J. Neural smithing: supervised learning in feedforward artificial  
388 neural networks. (Mit Press, 1999).
- 389 45. Andrews, T.S. & Hemberg, M. False signals induced by single-cell imputation.  
390 *F1000Res* **7**, 1740 (2018).
- 391 46. LeCun, Y., Bengio, Y. & Hinton, G. Deep learning. *Nature* **521**, 436-444 (2015).
- 392 47. Kingma, D. & Ba, J. Adam: a method for stochastic optimization (2014). *arXiv preprint*  
393 *arXiv:1412.6980* **15** (2015).
- 394 48. Subramanian, A. et al. Gene set enrichment analysis: a knowledge-based approach for  
395 interpreting genome-wide expression profiles. *Proc Natl Acad Sci U S A* **102**, 15545-  
396 15550 (2005).

397

398

## 399 **Figure legends**

400 Figure 1. cTP-net analysis pipeline and imputation of example proteins.

401 **(a)** Overview of cTP-net analysis pipeline, which learns a mapping from the denoised scRNA-  
402 seq data to the relative abundance of surface proteins, capturing multi-gene features that reflect  
403 the cellular environment and related processes. **(b)** For three example proteins, cross-cell  
404 scatter and correlation of CITE-seq measured abundances vs. (1) raw RNA count, (2) SAVER-X  
405 denoised RNA level, and (3) cTP-net predicted protein abundance.

406 Figure 2. Benchmark evaluation on CITE-seq PBMC data

407 **(a)** Benchmark evaluation of cTP-net on CITE-seq PBMC data, with comparisons to Seurat v3,  
408 in validation, across cell type, across tissue and across technology scenarios. The table on the  
409 left shows the training scheme of each test, the heatmap shows correlations with actual  
410 measured protein abundances. **(b)** Within cell type correlations between imputed and measured  
411 protein abundance on the CITE-seq PBMC data, Seurat v3 versus cTP-net. Each point (color  
412 and shape pair) indicates a cell type and surface protein pair, where the x-axis is correlation  
413 between actual measured abundance and Seurat imputation and y-axis is the correlation  
414 between actual measured abundance and cTP-net imputation. **(c)** Scatter of imputed versus  
415 measured abundance for the three (surface protein, cell type) pairs marked by arrows in (b):  
416 CD11c in CD14-CD16+ monocytes, CD2 in CD8 T cells, and CD19 in dendritic cells.

417 Figure 3. Imputation results analysis on Human Cell Atlas data sets.

418 **(a)** Left panel: UMAP visualization of MantonBM1 BMMCs T cell subpopulation based on RNA  
419 expression, colored by cell type. CD4 T: mature CD4+ T cells; mature CD8 T: CD8+ T cells;  
420 naïve CD4 T: naïve CD4+ T cells; naïve CD8 T: naïve CD8+ T cells; CD8 senescent T: CD8+  
421 senescent T cells. Right panel: Related imputed protein abundance and RNA expression of its



422 corresponding gene. **(b)** UMAP visualization of MantonBM1 BMMCs based on RNA expression,  
423 colored by cell type. B: B cells; CD4 T: CD4+ T cells; CD8 T: CD8+ T cells; cMono: classical  
424 monocyte; ncMono: non-classical monocyte; NK: natural killer cells; Pre.: precursors; Plasma:  
425 plasma cells. **(c)** Left panel: UMAP visualization of MantonBM1 BMMCs B cell subpopulation  
426 based on RNA expression, colored by cell type. Pre.B: B cell precursors; immature B: immature  
427 B cells; memory B: memory B cells; naïve B: naïve B cells. Right panel: Related imputed protein  
428 abundance and RNA expression of its corresponding gene. **(d)** UMAP visualization of  
429 MantonCB2 CBMCs based on RNA expression, colored by cell type. **(e)** cTP-net imputed  
430 protein abundance and RNA read count of its corresponding gene for 24 surface proteins. **(f)**  
431 UMAP visualization of MantonCB2 CBMCs NK cell subpopulation colored by CD56 and CD16  
432 imputed protein abundance and RNA read count. Reverse gradient is observed in cTP-net  
433 prediction but not in the read count for its corresponding RNA. **(f)** Contour plot of cells based on  
434 imputed CD56 and CD16 abundance in NK cell populations. Strong negative correlation with  
435 two subpopulation observed.

436 Figure 4. Imputation results analysis on Acute Myeloid Leukemia data sets.

437 **(a)** UMAP visualization of normal cells and malignant cells from 12 AML samples at Day0 based  
438 on imputed protein abundance (red: malignant cells; grey: normal cells). **(b)** UMAP visualization  
439 of the myeloid trajectory. cTP-net imputed protein abundance of markers that perfectly  
440 recapitulate the myeloid development. **(c, e, f)** UMAP visualization of the myeloid trajectory with  
441 corresponding malignant cells from AML sample highlighted. **(d)** Scatter plot of normal and AML  
442 malignant cells based on imputed protein expression.

443

## 444 Online Methods

### 445 Data sets and pre-processing

446 Table S1 summarizes the five data sets analyzed in this study: CITE-PBMC, CITE-CBMC,  
447 REAP-PBMC, HCA-CBMC and HCA-BMMC. Among these, CITE-PBMC, CITE-CBMC and  
448 REAP-PBMC have paired scRNA-seq and surface protein counts, while HCA-CBMC and HCA-  
449 BMMC have only scRNA-seq counts. For all scRNA-seq data sets, low quality gene (< 10  
450 counts across cells) and low-quality cells (less than 200 genes detected) are removed, and the  
451 count matrix ( $C$ ) for all remaining cells and genes is used as input for denoising. scRNA data  
452 denoising was performed with SAVER-X using default parameters. Denoised counts ( $\Lambda$ ) were  
453 further transformed with Seurat default LogNormalize function,

$$454 \quad X_{ij} = \log\left(\frac{\Lambda_{ij} * 10,000}{m_j}\right)$$

455 where  $\Lambda_{ij}$  is the denoised molecule count of gene  $i$  in cell  $j$ , and  $m_j$  is the sum of all molecule  
456 counts of cell  $j$ . The normalized denoised count matrix  $X$  is the training input for the subsequent  
457 multiple branch neural network. For the surface protein counts, we adopted the relative  
458 abundance transformation from Stoeckius et al.<sup>3</sup>. For each cell  $c$ ,

$$459 \quad y_c = \left[ \ln\left(\frac{p_{1c}}{g(p_c)}\right), \ln\left(\frac{p_{2c}}{g(p_c)}\right) \dots \ln\left(\frac{p_{dc}}{g(p_c)}\right) \right]$$

460 where  $p_c$  is vector of antibody-derived tags (ADT) counts, and  $g(p_c)$  is the geometric mean of  
461  $p_c$ . The network trained using this transformed relative protein abundance as the response  
462 vector yields better prediction accuracy than the network trained using raw protein barcode  
463 counts.

464

## 465 **cTP-net neural network structure and training parameters**

466 Figure S1 shows the structure of cTP-net. Here, we have a normalized expression matrix  $X$  of  $N$   
467 cells and  $D$  genes, and a normalized protein abundance matrix  $Y$  of the same  $N$  cells and  $d$   
468 surface proteins. Let's denote cTP-net as a function  $F$  that maps from  $\mathbb{R}^D$  to  $\mathbb{R}^d$ . Starting from  
469 the input layer, with dimension equals to number of genes  $D$ , the first internal layer has  
470 dimension 1000, followed by a second internal layer with dimension 128. These two layers are  
471 designed to learn and encode features that are shared across proteins, such as features that  
472 are informative for cell type, cell state and common processes such as cell cycle. The remaining  
473 layers are protein specific, with 64 nodes for each protein that feed into a one node output layer  
474 giving the imputed value. All layers except the last layer are fully connected (FC) with rectified  
475 linear unit (ReLU) activation function <sup>46</sup>, while the last layer is a fully connected layer with  
476 identity activation function for output. The objective function here is,

$$477 \quad \underset{F}{\operatorname{argmin}} |Y - F(X)|_1$$

478 where the loss is L1 norm. The objective function was optimized stochastically with Adam <sup>47</sup> with  
479 learning rate set to 10e-5 for 139 epochs (cross-validation). Other variations of cTP-net, which  
480 we found to have inferior performance, are illustrated in more details in Supplementary Note.

481

## 482 **Benchmarking procedure**

483 *Validation set testing procedure.* Figure S2a shows the validation set testing procedure. Given  
484 limited amount of data, we keep only 10% of the cells as the testing set, and use the other 90%  
485 of the cells for training. The optimal model was selected based on the testing error.

486 *Out-of-cell type prediction procedure.* We perform the out-of-cell type prediction based on  
487 Figure S2b. This procedure mimics cross-validation, except that, instead of selecting the test set

488 cells randomly, we partition the cells by their cell types. Iteratively, we designate all cells of a  
489 given cell type for testing and use the remaining cells for training. We then perform prediction on  
490 the hold-out cell type using the model trained on all other cell types. In the end, every cell has  
491 been tested once and has the corresponding predictions. In the benchmark against the  
492 validation set testing procedure, we limit comparisons to the same cells that were in the  
493 validation set in the holdout scheme to account for variations between subsets.

494 *Cell population and technology transfer learning procedure.* To apply the models we trained in  
495 validation set testing procedure to different cell populations and technologies, the inputs have to  
496 be in the same feature space. Even though all data sets considered are from human cells, the  
497 list of genes differs between experiments and technologies. Genes that are in the training data  
498 but not in the testing data are filled with zeros. Because cTP-net utilizes overrepresented  
499 number of genes to predict the surface proteins level, having a small number of genes missing  
500 has little effect on the performance. After prediction, we selected only the shared proteins  
501 between two data sets for comparison.

502

### 503 **cTP-net interpolation**

504 To better interpret the relationships that the neural network is learning, we developed a  
505 permutation-based interpolation scheme that can calculate an influence score  $epi$  for each gene  
506 in the imputation of each protein (Figure S6). The idea is to assess how much changing the  
507 expression value of certain genes in the training data affects the training errors for a given  
508 model  $F$ . In each epoch, we interpolate all of the genes in a stochastic manner. Let's denote  $X$   
509 as the expression matrix ( $N$  by  $G$  matrix, where  $N$  is the number of cells and  $G$  is number of  
510 genes),  $Y$  as protein abundance matrix and  $L$  as the loss function. The algorithm goes as follow  
511 (Figure S6):

- 512 (1) Estimate the original model error  $\epsilon^{orig} = L(Y, F(X))$ .
- 513 (2) Sampling batch of genes denote by  $g_s$ . Generate expression matrix  $X^{perm}$  by permuting  
514 genes in  $g_s$  in the data  $X$ . This breaks the association between  $g_s$  and protein  
515 abundance  $Y$ , i.e. the cell order within  $g_s$  does not coordinate with protein abundance  $Y$ .
- 516 (3) Estimate error  $\epsilon^{perm} = L(Y, F(X^{perm}))$  based on the predictions of the permuted data.
- 517 (4) Calculate permutation feature importance  $\Delta_{g_s} = |\epsilon^{orig} - \epsilon^{perm}|$  of gene set  $g_s$  to this  
518 model  $F$ .

519 We set batch size as 100 with 500 epochs. Furthermore, by picking different cells to interpolate,  
520 we could identify gene influence score in different cell types. For example, if matrix  $X$  belongs to  
521 a given cell type, the cell type specific genes are consistent across cells of the given cell type,  
522 and thus, the permutation will not influence these genes. Genes that influence the surface  
523 protein abundance within the cell type, such as cell cycle genes and protein synthesis genes,  
524 tend to be rewarded with high influence scores in such a cell-type specific interpolation analysis.

525 For the top 100 highest influence scored genes from the following scenarios in CITE-PBMC: (1)  
526 CD45RA in CD14-CD16+ monocytes, (2) CD11c in CD14-CD16+ monocytes, (3) CD45RA in  
527 CD8 T cells, (4) CD45RA in CD4 T cells, (5) CD11c in CD14+CD16+ monocytes, (6) CD45RA  
528 in dendritic cells, and (7) CD11c in dendritic cells, we employed a Gene Ontology analysis<sup>48</sup>  
529 which identify top 10 pathways based on GO gene sets with FDR q-value < 0.05 as significant  
530 (Table S4).

531

### 532 **Seurat anchor-transfer analysis**

533 We compared cTP-net with an anchor-based transfer learning method developed in Seurat v3  
534<sup>20</sup>. For Seurat v3, RNA count data are normalized by LogNormalization method, while surface  
535 protein counts are normalized by centered log-ratio (CLR) method. In validation test setting, we

536 used the same cells for training and testing as in cTP-net so as to be directly comparable to  
537 cTP-net. For out-of-cell type prediction, default parameters did not work for several cell types in  
538 anchor-transfer step, because, for those cell types, there are few anchors shared between the  
539 training and testing sets. To overcome this, we reduced the number of anchors iteratively until  
540 the function ran successfully.

541

## 542 **HCA data analysis**

543 *HCA RNA-seq transcriptome data analysis.* HCA RNA-seq data sets are processed as  
544 discussed above, resulting in log-normalized denoised values. We applied default pipeline of  
545 Seurat and generated t-SNE plot for both data sets (Figure S7). Cells are clearly clustered by  
546 individuals, indicating strong batch effects. As a result, the following analysis was performed on  
547 cells of each individual. Major cell types were determined by known gene markers.

548 *Surface protein prediction by cTP-net.* From the log-normalized denoised expression value, we  
549 predict the surface protein abundance with cTP-net model trained jointly on CITE-seq PBMC  
550 and CBMC data sets. We embedded 12 surface protein abundance across 16 individuals on t-  
551 SNE plot, showing consistent results with cell type information (Figure S8, S9).

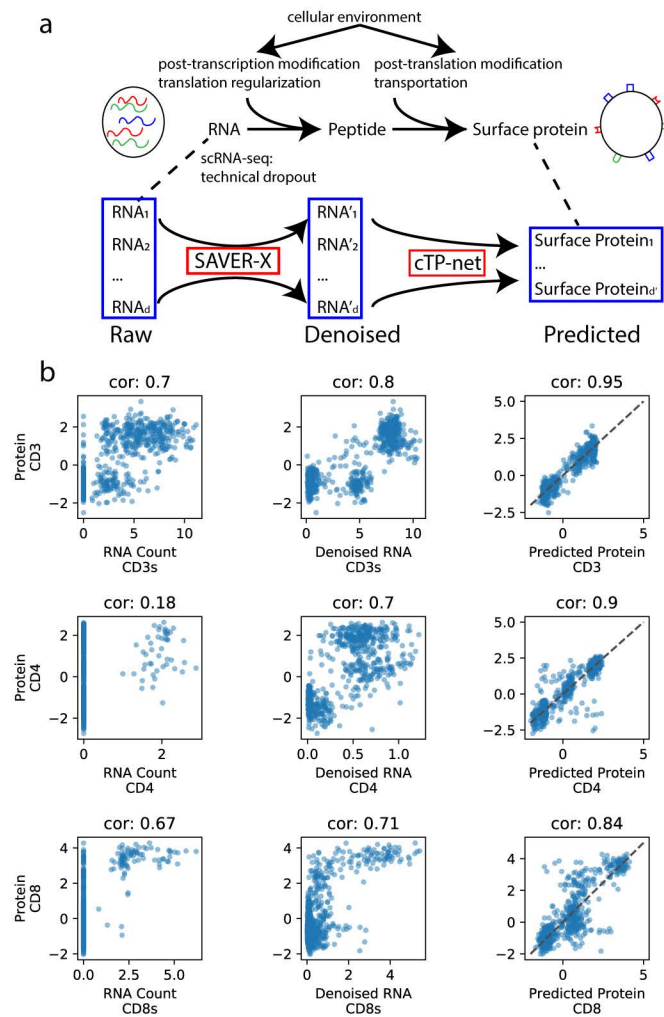

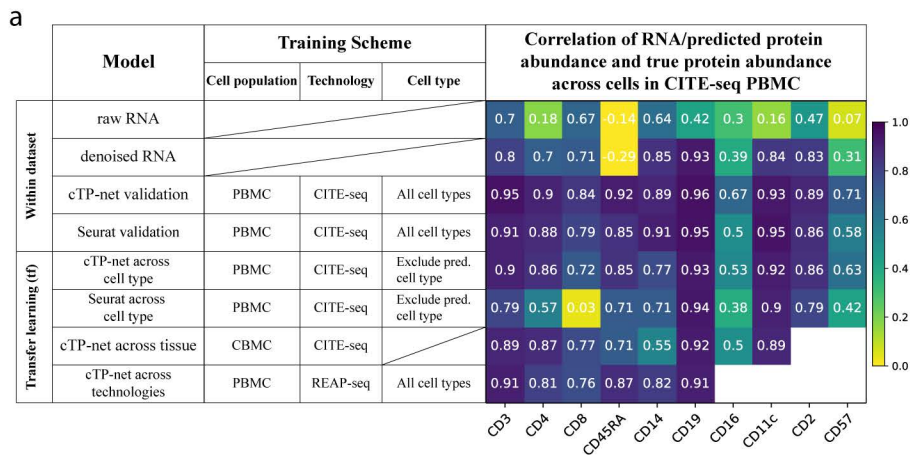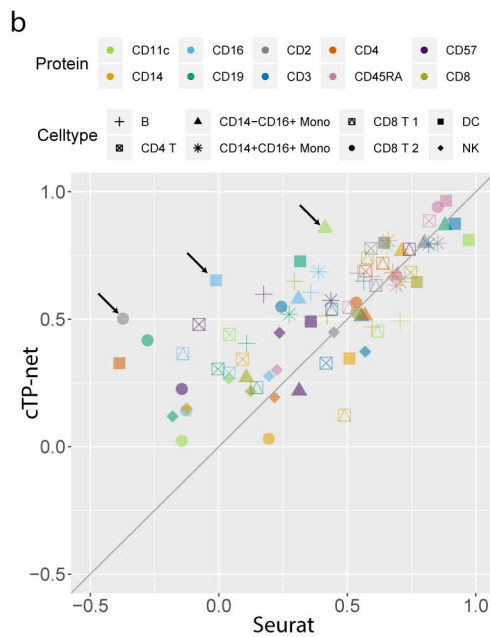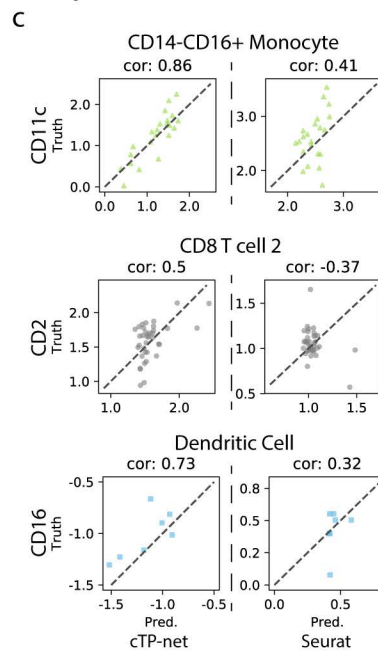



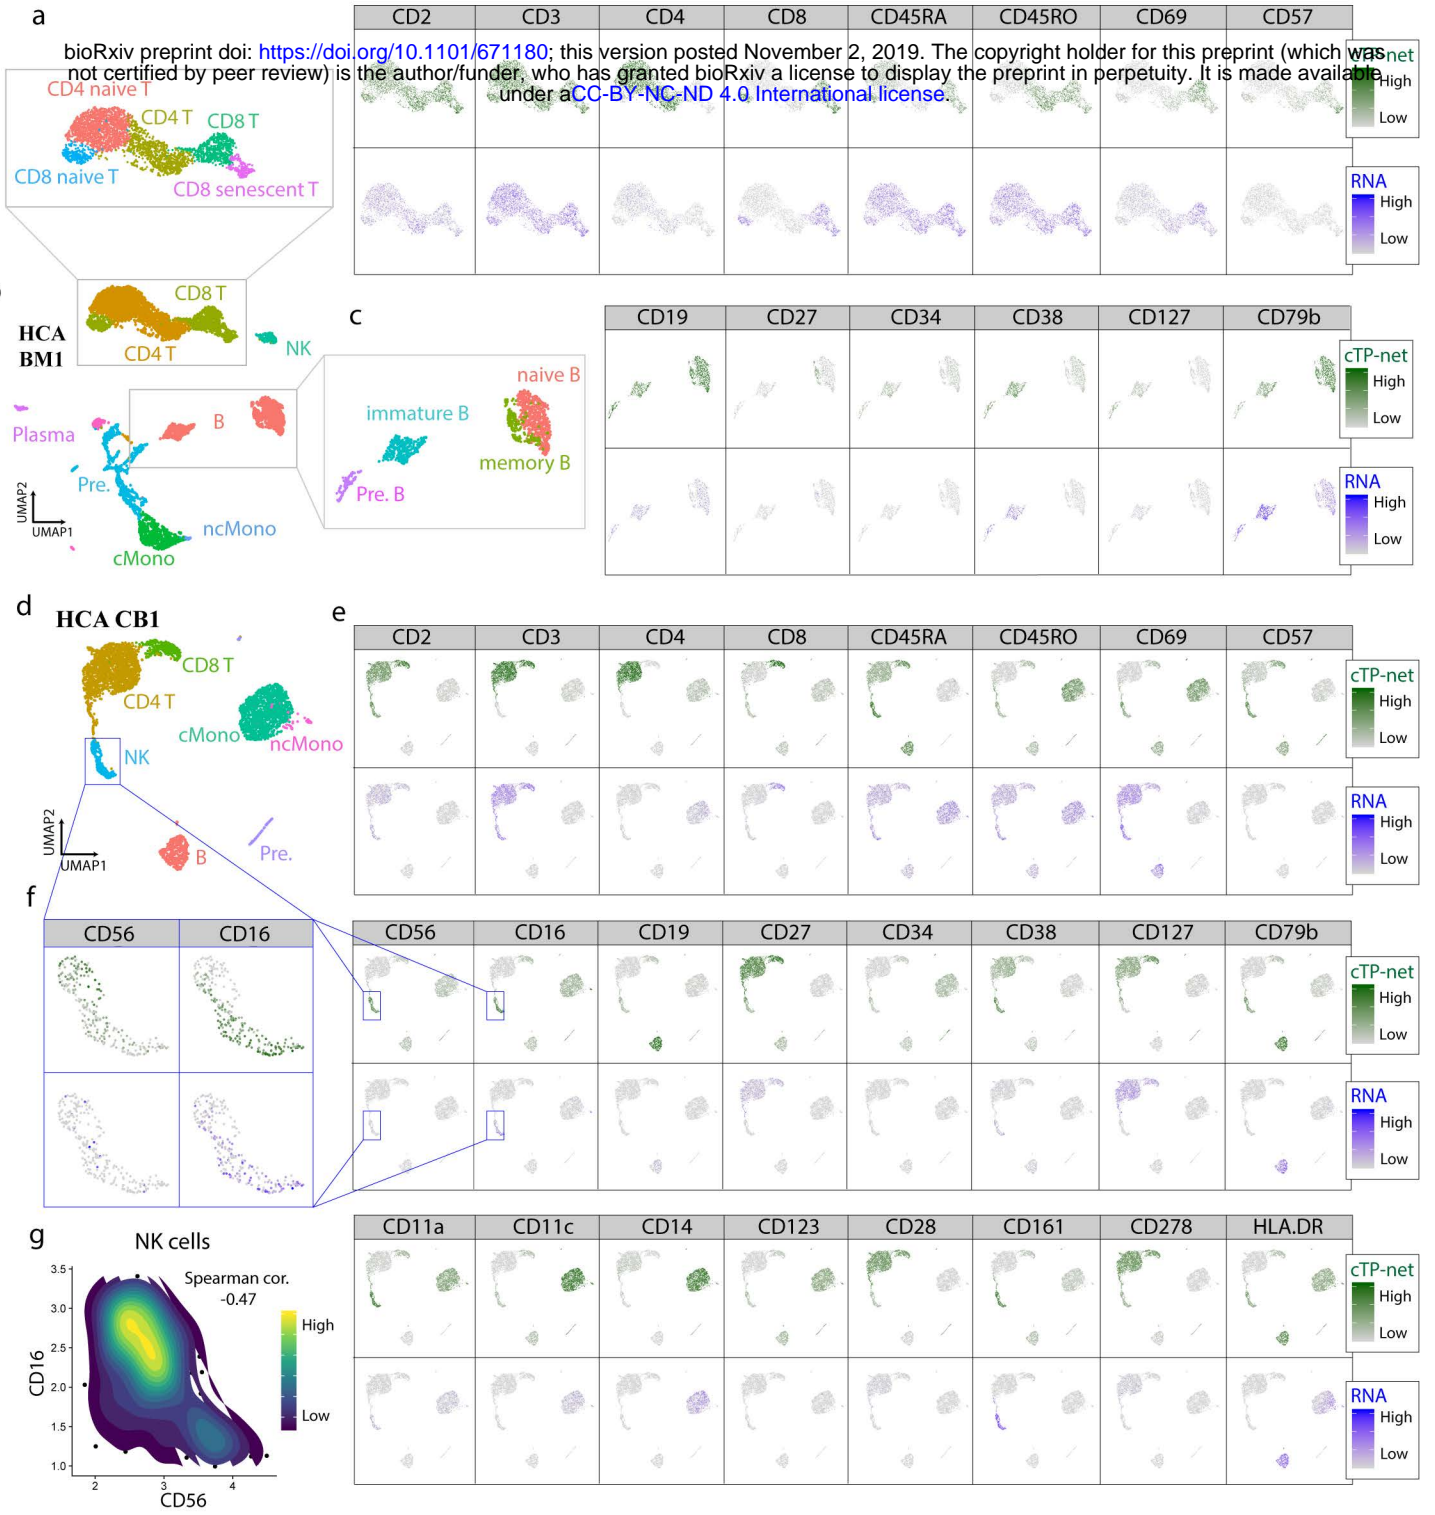

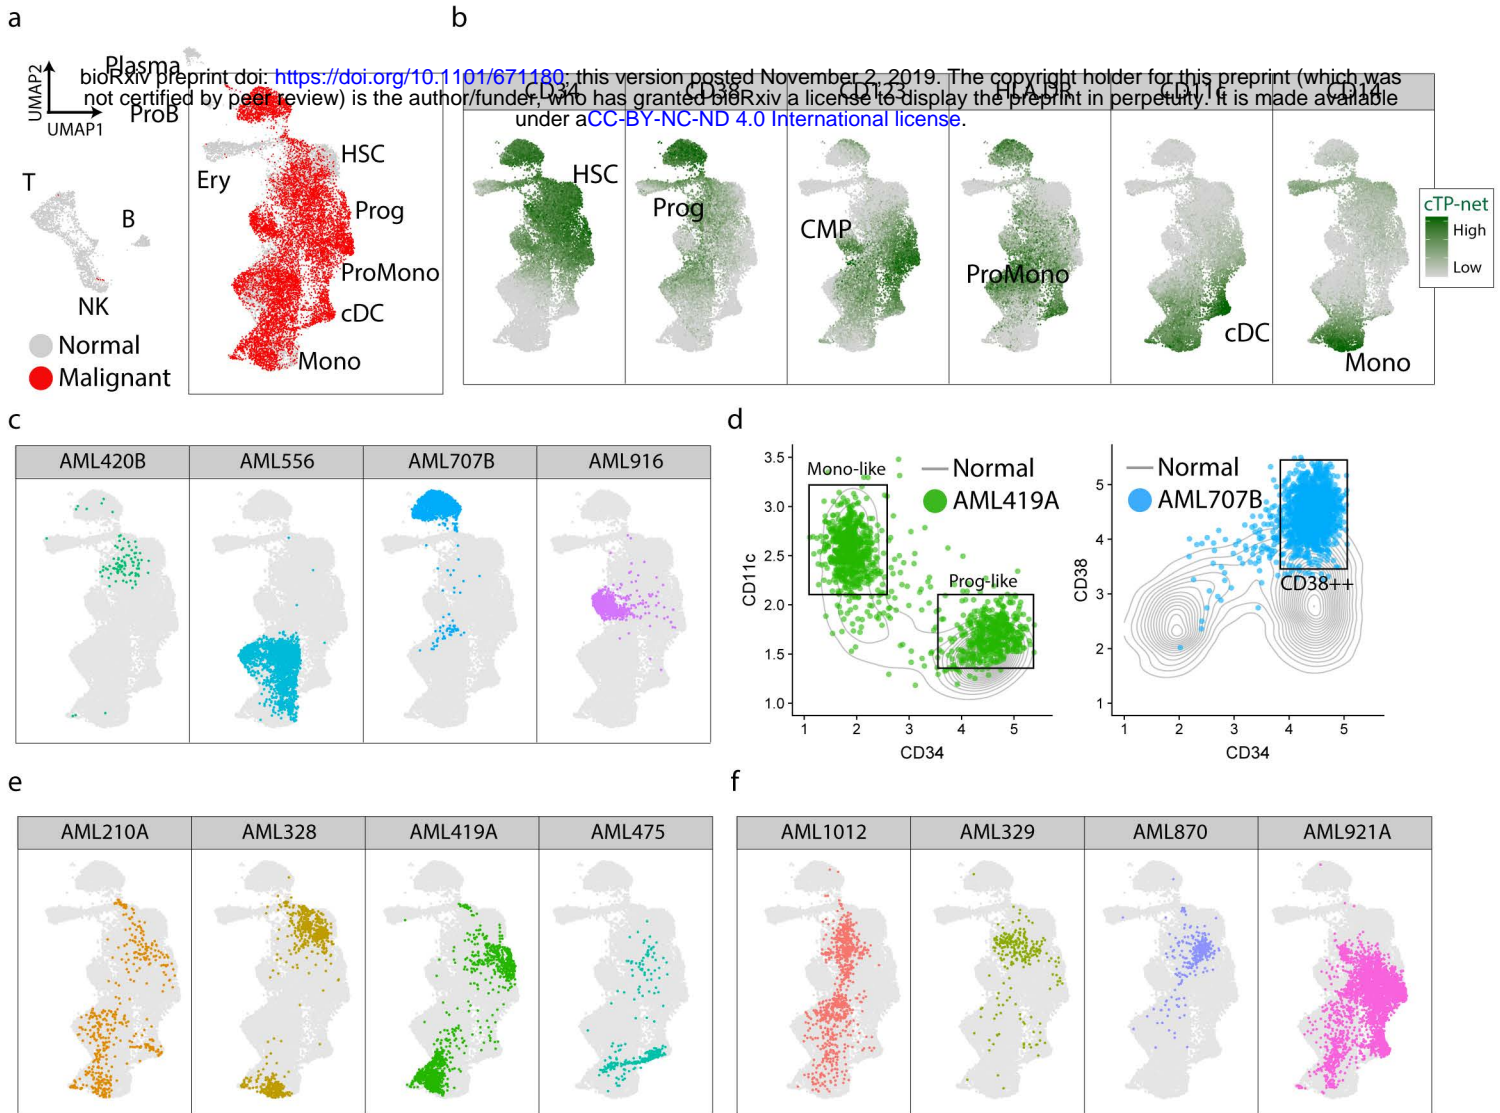

Source: http://biorxiv.org/content/10.1101/671180v2.full.pdf
