# Supplementary material for: Surface protein imputation from single cell transcriptomes by deep neural networks
Source: bioRxiv or medRxiv preprint supplement (doi:10.1101/671180), 2019-11-02
Supplement: Supplementary file [file media-2.pdf]

**Supplementary note 1.** cTP-net models tested on CITE-seq PBMC data sets

Table S5 illustrates the different models we have tested. The first column indicates the differences to the finalized models, while the second column shows the correlation of the predicted protein abundance to the true protein abundance in the holdout setting on CITE-seq PBMC data set. As shown by Table S5, missing any component of the final model will result in inferior performance.

**Table S1.** Summary table of five data sets analyzed in this study

| Data      | Technology | Cell population | # of subjects | # of cells | # of genes | # of proteins | # of cell types |
|-----------|------------|-----------------|---------------|------------|------------|---------------|-----------------|
| CITE-PBMC | CITE-seq   | PBMC            | 1             | 7667       | 13517      | 10            | 8               |
| CITE-CBMC | CITE-seq   | CBMC            | 1             | 8005       | 14505      | 10            | 12              |
| REAP-PBMC | REAP-seq   | PBMC            | 1             | 4326       | 10811      | 10            | NA              |
| HCA-CBMC  | 10x        | CBMC            | 8             | 260,000    | 12611      | NA            | NA              |
| HCA-BMMC  | 10x        | BMMC            | 8             | 270,000    | 12611      | NA            | NA              |

**Table S2.** Cell type summary of CITE-seq data sets

| Data             | Cell types                                                                  |
|------------------|-----------------------------------------------------------------------------|
| <b>CITE-PBMC</b> | B, CD8 T-1, CD4 T, NK, DC, CD14+CD16+ Mono, CD14-CD16+ Mono, CD8 T 2        |
| <b>CITE-CBMC</b> | B, CD8 T, CD4 T, NK, DC, CD14+ Mono, CD16+ Mono, pDC, CD34+, Eryth, Unknown |

**Table S3.** Top 20 highest influence score genes for each protein in CITE-PBMC data set

| CD3          | CD4           | CD8           | CD2          | CD45RA      | CD57          | CD16          | CD14     | CD11c        | CD19       |
|--------------|---------------|---------------|--------------|-------------|---------------|---------------|----------|--------------|------------|
| CD3D         | CD8B          | CD8B          | CCL5         | KLRB1       | NUDT6         | CHL1          | C1orf115 | CFD          | CCL5       |
| IL7R         | CD8A          | CD8A          | IL7R         | CCL5        | MZT2A         | RP11-242C19.2 | PEAK1    | MAL          | CD8B       |
| CD8B         | RP11-291B21.2 | CCL5          | RP4-539M6.22 | EIF1AX      | ATP2A2        | GCSH          | ALDH7A1  | ANKRD36C     | RN7SL600P  |
| FCER1G       | CCL5          | TRDC          | LTV1         | CD7         | IQCE          | NRL           | CYBB     | BLOC1S3      | MYO1D      |
| TRDC         | NCR3          | RP11-291B21.2 | RP11-452L6.5 | TST         | PKNOX1        | DBF4          | ISYNA1   | IGLL5        | HSF2       |
| AKR7A2       | KLRB1         | CHMP7         | FBXO10       | MFSD7       | FBXW8         | SPHK2         | LMAN1    | RP11-159G9.5 | AC142528.1 |
| HELLS        | DDIT3         | ZAP70         | LINC00384    | ZFAS1       | CTA-217C2.1   | CDKL1         | FAM162A  | ARMCX1       | DNAJA3     |
| ALG10        | CTD-2547L16.1 | BMP8B         | ACAP2        | TAPSAR1     | CNOT11        | TIMM21        | SLC4A7   | SLC6A16      | GLB1L      |
| FGD5-AS1     | C18orf25      | FAH           | PPCDC        | PLEKHF1     | HSD17B4       | MRPS18C       | MIER3    | LRRC16A      | LIMD2      |
| COMMD7       | FPGT          | AC009299.3    | ANKRD39      | CTBP1-AS2   | CLEC4E        | C7orf43       | SLC11A2  | TRAF1        | DTX3L      |
| CTA-292E10.8 | NETO2         | CMKLR1        | AIM2         | CYP27A1     | FAM98C        | GORASP2       | ZAP70    | PABPN1       | PTCD2      |
| ZC2HC1A      | GDAP1         | ENTPD1        | TTLL12       | MAN1A2      | PRMT1         | CTD-2555C10.3 | MAP4     | ADM          | LPAR1      |
| INADL        | CSTF1         | PIK3CA        | GABBR1       | FAM115C     | SLC25A11      | LEPROT        | TTY15    | KIAA0319L    | ZNF649     |
| SHISA4       | RP11-159H10.3 | WDR7          | DCUN1D4      | CST3        | TCEANC2       | RUSC1         | HS1BP3   | MRPL4        | HLA-DRB5   |
| DCAF4        | RP11-451M19.3 | HEG1          | CPD          | NAIF1       | LCTL          | POLR2L        | PRPSAP1  | NDRG1        | LIN54      |
| HPGDS        | ENTPD1-AS1    | NPAT          | RAPGEFL1     | RP11-83N9.5 | CAPN1         | RP11-85A1.3   | ZBTB38   | FAM63A       | USP32      |
| PACSIN1      | SLC4A10       | 7-Sep         | U91328.20    | FCGR3A      | VPS26A        | FKBP7         | PIK3R1   | RPL34        | AIM2       |
| ARID4B       | FAAH2         | CDT1          | EIF4H        | CCDC163P    | ECHS1         | RNF24         | PIGG     | FAM118B      | SLC12A7    |
| ATP11A       | AP5B1         | QRICH1        | AC073115.7   | POLR1C      | FLVCR1-AS1    | TBXAS1        | DESI2    | UBQLN4       | ZNF671     |
| RN7SL521P    | DHPS          | AP2M1         | RP11-4O1.2   | PRSS35      | RP11-421L21.2 | WDR83         | SIRT5    | FKBP15       | TNNI2      |

**Table S4.** Gene set enrichment analysis on cell-immunophenotype pairs that cTP-net predict well in CITE-PBMC data set

| Surface protein | Cell type      | GO pathways                                                    |
|-----------------|----------------|----------------------------------------------------------------|
| CD45RA          | CD14-CD16+Mono | GO_CATABOLIC_PROCESS                                           |
|                 |                | GO_PROTEIN_LOCALIZATION                                        |
|                 |                | GO_REGULATION_OF_CELLULAR_COMPONENT_BIOGENESIS                 |
|                 |                | GO_CELLULAR_RESPONSE_TO_STRESS                                 |
|                 |                | GO_CELLULAR_RESPONSE_TO_DNA_DAMAGE_STIMULUS                    |
|                 |                | GO_RNA_BINDING                                                 |
|                 |                | GO_ESTABLISHMENT_OF_LOCALIZATION_IN_CELL                       |
|                 |                | GO_CELL_CYCLE                                                  |
|                 |                | GO_SINGLE_ORGANISM_BIOSYNTHETIC_PROCESS                        |
|                 |                | GO_CELLULAR_MACROMOLECULE_LOCALIZATION                         |
| CD11c           | CD14-CD16+Mono | GO_CELLULAR_RESPONSE_TO_STRESS                                 |
|                 |                | GO_NEGATIVE_REGULATION_OF_GENE_EXPRESSION                      |
|                 |                | GO_POSITIVE_REGULATION_OF_BIOSYNTHETIC_PROCESS                 |
|                 |                | GO_POSITIVE_REGULATION_OF_GENE_EXPRESSION                      |
|                 |                | GO_CELL_CYCLE                                                  |
|                 |                | GO_POSITIVE_REGULATION_OF_PROTEIN_METABOLIC_PROCESS            |
|                 |                | GO_NEGATIVE_REGULATION_OF_NITROGEN_COMPOUND_METABOLIC_PROCESS  |
|                 |                | GO_CYTOSKELETON                                                |
|                 |                | GO_CHROMOSOME                                                  |
|                 |                | GO_ENZYME_BINDING                                              |
| CD45RA          | CD8 T 2        | GO_ENZYME_BINDING                                              |
|                 |                | GO_RNA_BINDING                                                 |
|                 |                | GO_RIBONUCLEOPROTEIN_COMPLEX                                   |
|                 |                | GO_REGULATION_OF_TRANSCRIPTION_FROM_RNA_POLYMERASE_II_PROMOTER |
|                 |                | GO_CELL_CYCLE                                                  |
|                 |                | GO_RNA_PROCESSING                                              |
|                 |                | GO_POSITIVE_REGULATION_OF_BIOSYNTHETIC_PROCESS                 |
|                 |                | GO_CYTOSKELETON                                                |
|                 |                | GO_RIBONUCLEOTIDE_BINDING                                      |
|                 |                | GO_POSITIVE_REGULATION_OF_GENE_EXPRESSION                      |
| CD45RA          | CD4 T          | GO_REGULATION_OF_IMMUNE_SYSTEM_PROCESS                         |
|                 |                | GO_IMMUNE_SYSTEM_PROCESS                                       |
|                 |                | GO_VACUOLE                                                     |
|                 |                | GO_SMALL_MOLECULE_METABOLIC_PROCESS                            |
|                 |                | GO_ORGANONITROGEN_COMPOUND_METABOLIC_PROCESS                   |
|                 |                | GO_ESTABLISHMENT_OF_LOCALIZATION_IN_CELL                       |
|                 |                | GO_POSITIVE_REGULATION_OF_MULTICELLULAR_ORGANISMAL_PROCESS     |

|                          |                     |                                                                   |
|--------------------------|---------------------|-------------------------------------------------------------------|
|                          |                     | GO_ENDOPLASMIC_RETICULUM                                          |
|                          |                     | GO_REGULATION_OF_TRANSCRIPTION_FROM_RNA_POLYMERASE_II_PROMOTER    |
|                          |                     | GO_PROTEIN_LOCALIZATION                                           |
| CD11c                    | CD14+CD16<br>+ Mono | GO_POSITIVE_REGULATION_OF_GENE_EXPRESSION                         |
|                          |                     | GO_DNA_REPLICATION                                                |
|                          |                     | GO_POSITIVE_REGULATION_OF_MOLECULAR_FUNCTION                      |
|                          |                     | GO_POSITIVE_REGULATION_OF_BIOSYNTHETIC_PROCESS                    |
|                          |                     | GO_SINGLE_ORGANISM_BIOSYNTHETIC_PROCESS                           |
|                          |                     | GO_DNA_DEPENDENT_DNA_REPLICATION                                  |
|                          |                     | GO_PHOSPHATE_CONTAINING_COMPOUND_METABOLIC_PROCESS                |
|                          |                     | GO_CELL_JUNCTION                                                  |
|                          |                     | GO_CYTOKINE_RECEPTOR_BINDING                                      |
|                          |                     | GO_ORGANONITROGEN_COMPOUND_BIOSYNTHETIC_PROCESS                   |
| CD45RA                   | DC                  | GO_NEGATIVE_REGULATION_OF_NITROGEN_COMPOUND_METABOLIC_PROCESS     |
|                          |                     | GO_POLY_A_RNA_BINDING                                             |
|                          |                     | GO_CHROMOSOME_ORGANIZATION                                        |
|                          |                     | GO_REGULATION_OF_DNA_METABOLIC_PROCESS                            |
|                          |                     | GO_RNA_BINDING                                                    |
|                          |                     | GO_MACROMOLECULAR_COMPLEX_BINDING                                 |
|                          |                     | GO_PHOSPHATE_CONTAINING_COMPOUND_METABOLIC_PROCESS                |
|                          |                     | GO_NEGATIVE_REGULATION_OF_GENE_EXPRESSION                         |
|                          |                     | GO_ESTABLISHMENT_OF_LOCALIZATION_IN_CELL                          |
| GO_DNA_METABOLIC_PROCESS |                     |                                                                   |
| CD11c                    | DC                  | GO_ENZYME_BINDING                                                 |
|                          |                     | GO_RIBONUCLEOTIDE_BINDING                                         |
|                          |                     | GO_ESTABLISHMENT_OF_LOCALIZATION_IN_CELL                          |
|                          |                     | GO_NEGATIVE_REGULATION_OF_PROTEIN_METABOLIC_PROCESS               |
|                          |                     | GO_IMMUNE_SYSTEM_PROCESS                                          |
|                          |                     | GO_ORGANONITROGEN_COMPOUND_BIOSYNTHETIC_PROCESS                   |
|                          |                     | GO_PHOSPHATE_CONTAINING_COMPOUND_METABOLIC_PROCESS                |
|                          |                     | GO_PHOSPHORYLATION                                                |
|                          |                     | GO_NEGATIVE_REGULATION_OF_PROTEIN_MODIFICATION_PROCESS            |
|                          |                     | GO_TRANSFERASE_ACTIVITY_TRANSFERRING_PHOSPHORUS_CONTAINING_GROUPS |

**Table S5.** Summary table of different cTP-net models

| <b>Differences to the finalized model</b>                          | <b>Correlation</b> |
|--------------------------------------------------------------------|--------------------|
| Without SAVER-X denoising, without MB structure, Adagrad optimizer | 0.939              |
| Without SAVER-X denoising, without MB structure                    | 0.961              |
| Without MB structure                                               | 0.968              |
| L2 loss                                                            | 0.969              |
| Set bottle neck layer to 256 nodes (128 in finalized model)        | 0.967              |
| <b>Final model</b>                                                 | <b>0.970</b>       |
